# Supplementary material for: Identification of Antiglycative Compounds in Japanese Red Water Pepper (Red Leaf Variant of the Persicaria hydropiper Sprout)
Source: MDPI journal article supplement (doi:10.3390/molecules23092319), 2018-09-11
Supplement: s1 [file s1]

## Supplementary Materials:

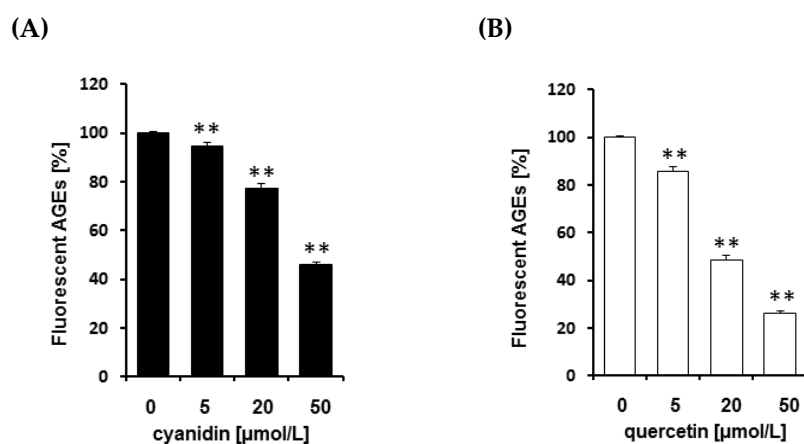

**Figure S1. Efficacy of aglycons against formation of fluorescent AGEs.** The indicated concentration of (A) cyanidin and (B) quercetin were used to determine their inhibitory effect against formation of fluorescent AGEs in the HSA glycation model. After 40 h incubation at 60 °C, fluorescent AGEs were measured at 370/440 nm. \*\*  $p < 0.01$  vs. 0  $\mu\text{mol/L}$ .

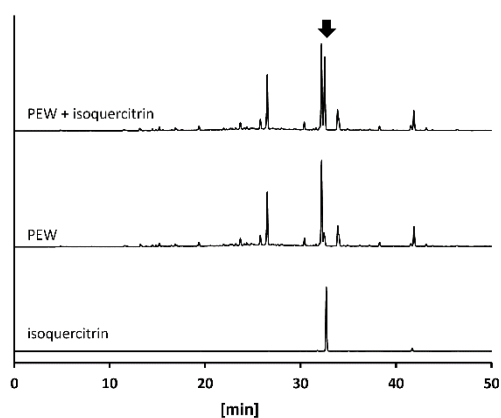

**Figure S2. Comparison of isolated peaks from *Persicaria hydropiper* extract with isoquercitrin.** Ten micrograms of PEW was mixed with isoquercitrin (0.4 nmol) and analyzed using HPLC-UV at 270 nm.

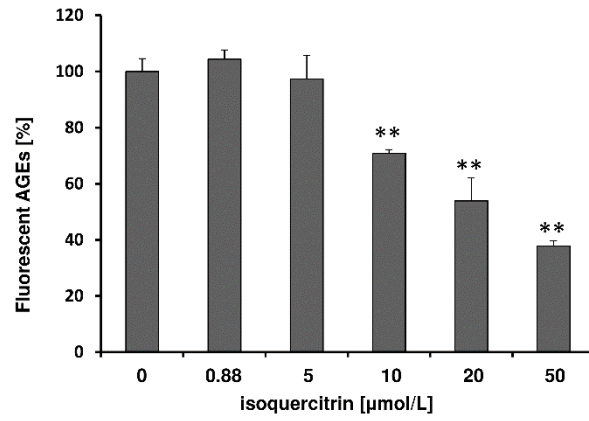

**Figure S3. Efficacy of isoquercitrin against formation of fluorescent AGEs.** The indicated concentration of isoquercitrin were used to determine the inhibitory effect against formation of fluorescent AGEs in the HSA glycation model. After 40 h incubation at 60 °C, fluorescent AGEs were measured at 370/440 nm. \*\*  $p < 0.01$  vs. 0 µmol/L.
